# Supplementary material
Source: PubMed Central journal article supplement (PMC4397187)
Supplement: NIHMS664187-supplement-Supp_FigureS1-S7.pdf [file NIHMS664187-supplement-Supp_FigureS1-S7.pdf]

**Substantially elevating the levels of  $\alpha$ B-crystallin in spinal motor neurons of mutant SOD1 mice does not significantly delay paralysis or attenuate mutant protein aggregation**

Guilian Xu, Susan Fromholt, Jacob I. Ayers, Hilda Brown, Zoe Siemienski, Keith W. Crosby, Christopher A. Mayer, Christopher Janus, David R. Borchelt

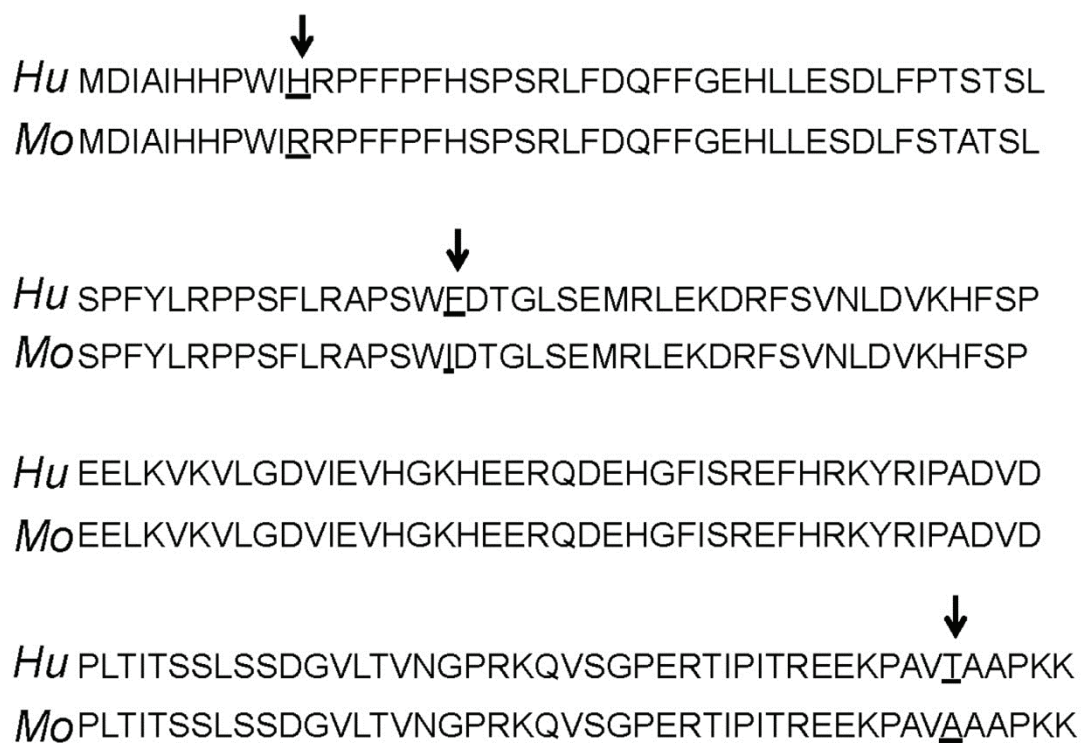

**Figure S1.** Amino acid sequence alignment of mouse and human  $\alpha$ B-crys.

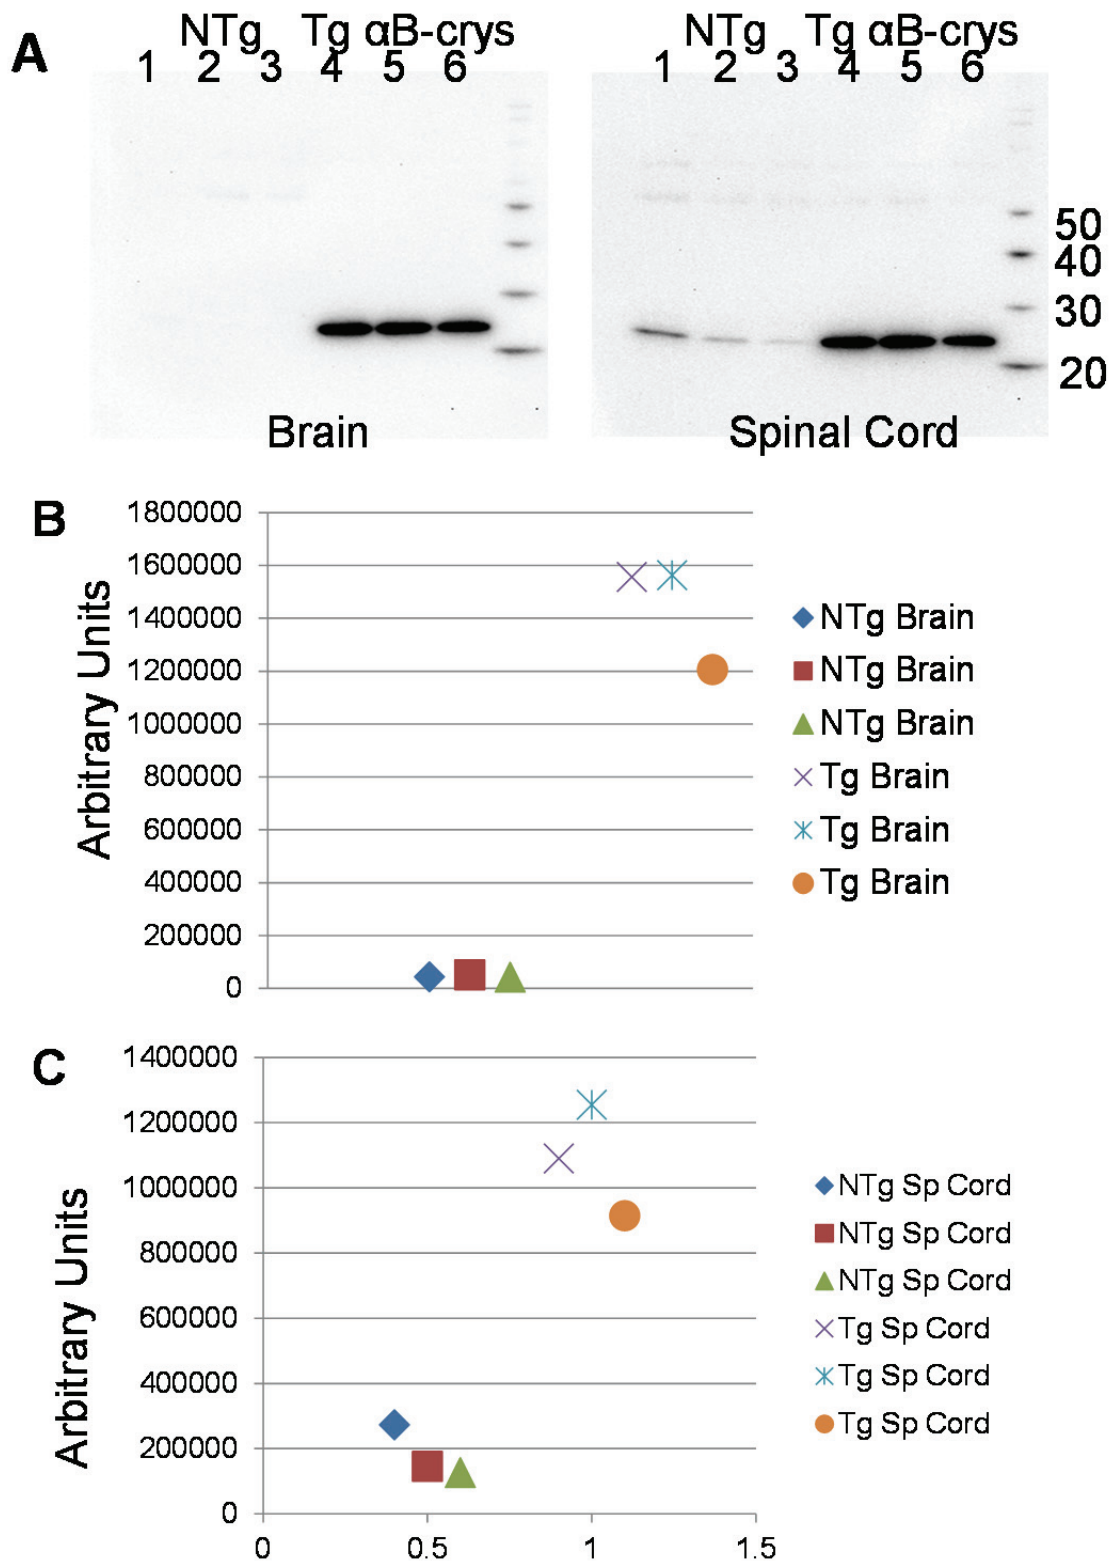

**Figure S2.** Quantification of  $\alpha$ B-crys levels in  $\alpha$ B-crys (Z104) transgenic mice. Immunoblots of  $\alpha$ B-crys in the brain and spinal cord of Z104 transgenic mice (Panel A) were quantified using software provided with a FluorChem E imaging device (Protein Simple, Santa Clara, CA, USA). The intensity of each band was assigned an arbitrary unit by the software, indicative of the pixel values for each band. Homogenates from 3 animals were analyzed by SDS-PAGE and immunoblot before quantification. The increase in  $\alpha$ B-crys levels in both brain and spinal cord were statistically significant ( $p=0.00003$  and  $0.001$ , respectively).

L45 x Z104

G93A x Z104

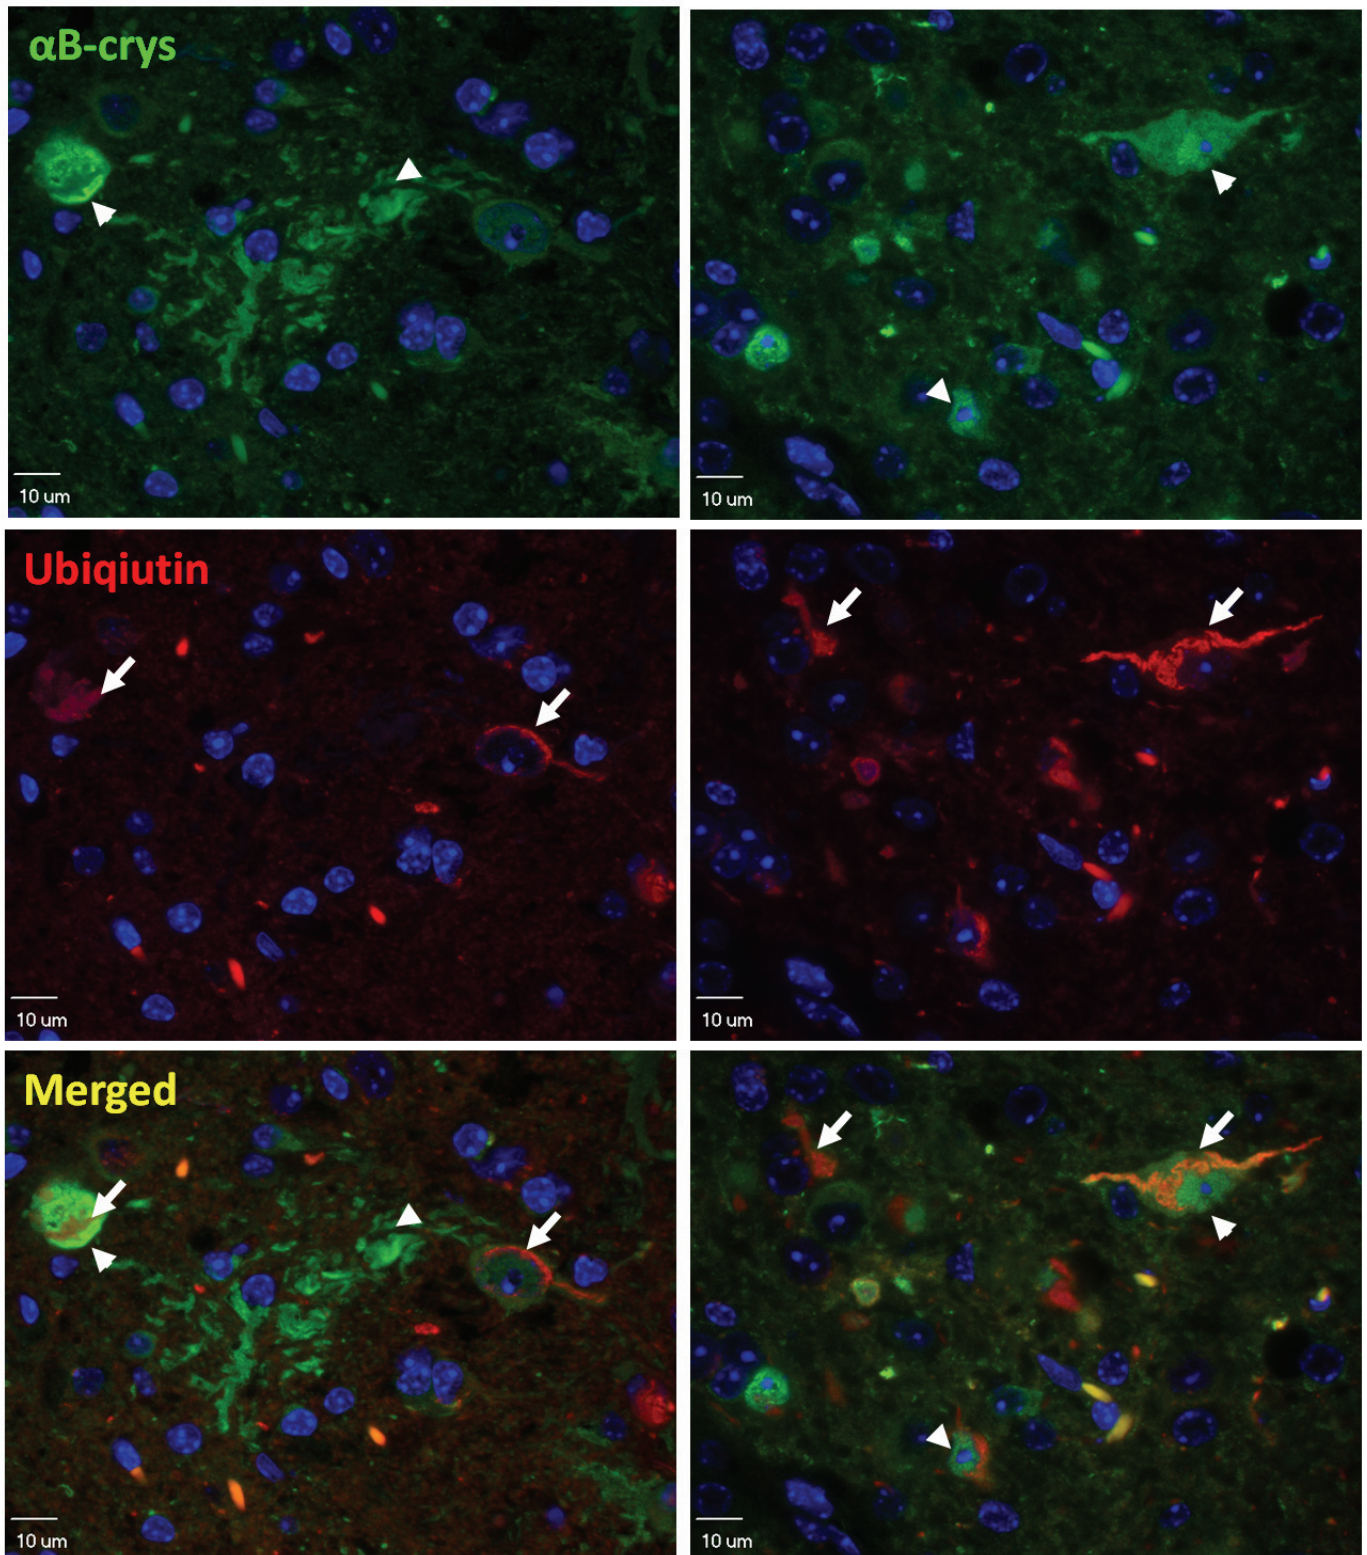

**Figure S3.**  $\alpha$ B-cry does not exclusively co-localize with ubiquitin immunoreactive aggregates in spinal cords of paralyzed bigenic mice. Tissue sections from paralyzed bigenic mice were immunostained with antibodies to ubiquitin and  $\alpha$ B-cry as described in Materials and Methods. We commonly observed ubiquitin immunoreactive inclusion-like structures in which  $\alpha$ B-cry immunoreactivity did not seem to specifically co-localize even though the cell possessed diffusely distributed immunoreactivity.



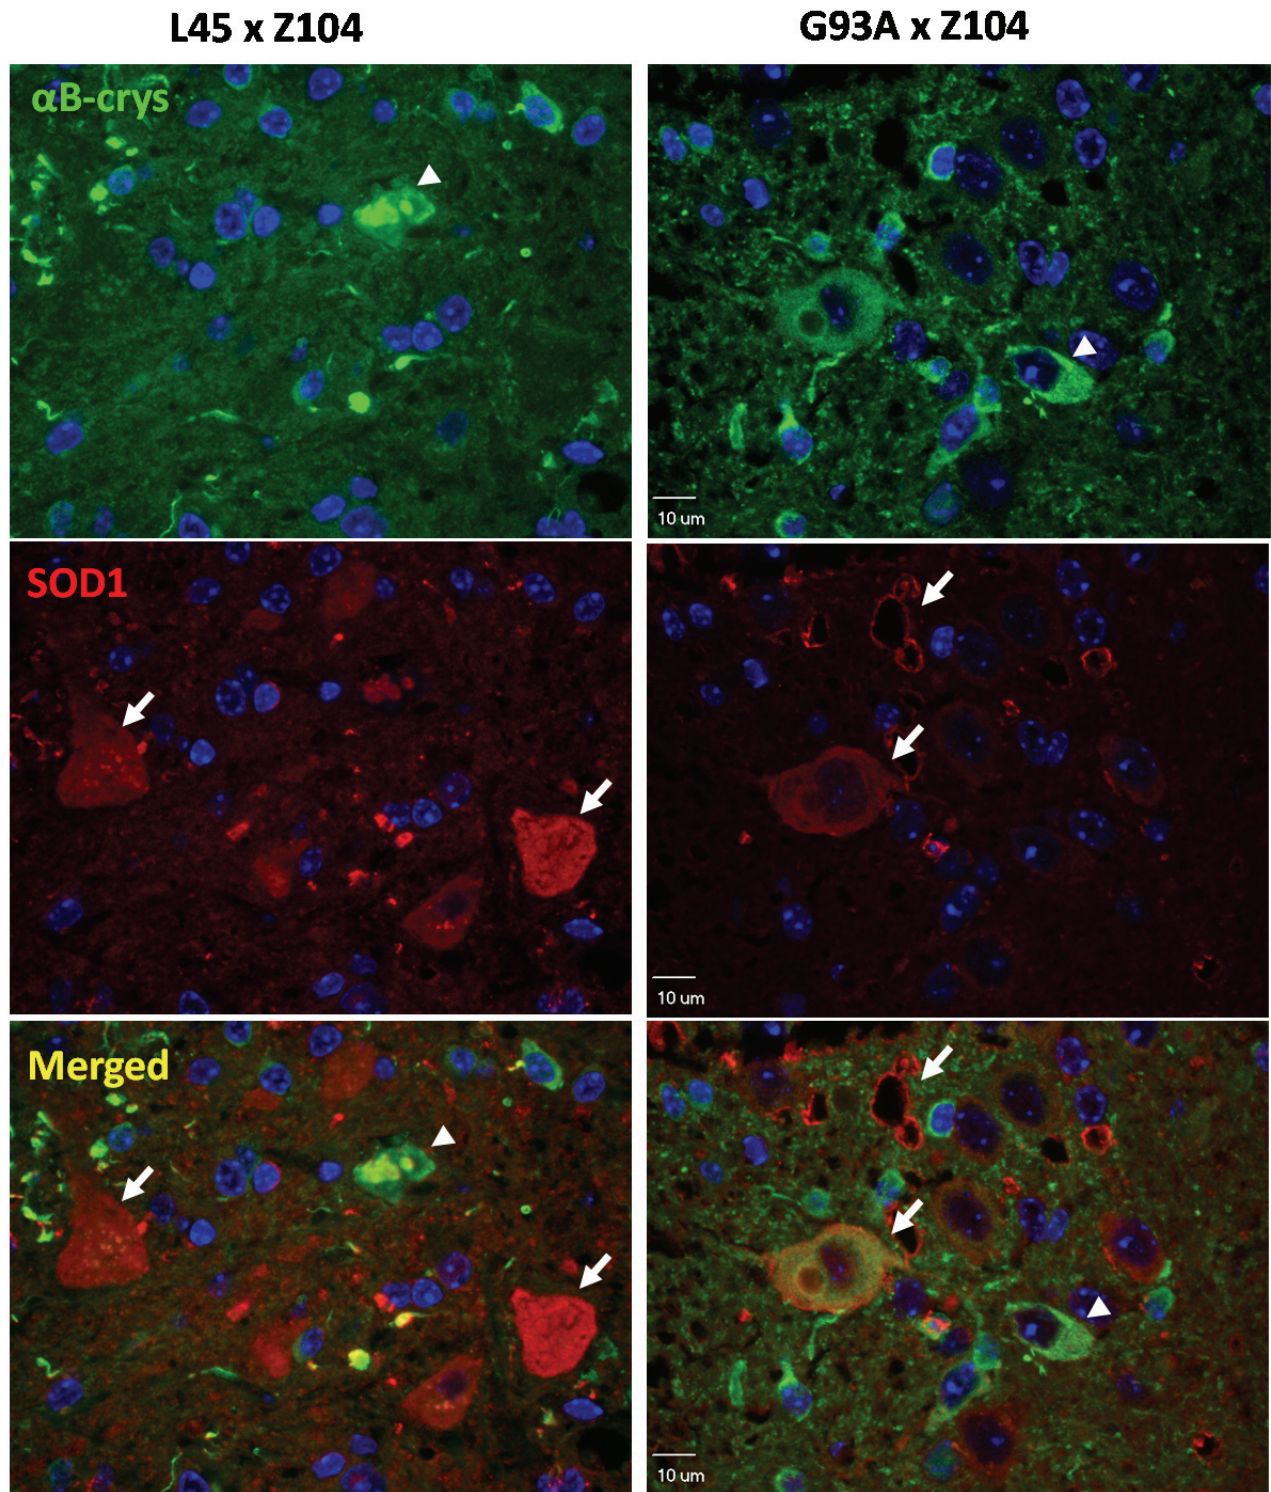

**Figure S4.**  $\alpha$ B-crys does not exclusively co-localize with SOD1 immunoreactive inclusions in spinal cords of paralyzed bigenic mice. Tissue sections from paralyzed bigenic mice were immunostained with antibodies to SOD1 and  $\alpha$ B-crys as described in Materials and Methods. In the L126Z/ $\alpha$ B-crys bigenic mice, we commonly observed accumulations of  $\alpha$ B-crys immunoreactivity that did not appear to contain mutant SOD1. In bigenic G93A/ $\alpha$ B-crys mice, we commonly observed vacuoles rimmed with SOD1 immunoreactivity that were not similarly rimmed by  $\alpha$ B-crys immunoreactivity. Neurons in which mutant SOD1 accumulated did appear to co-express  $\alpha$ B-crys but we could not discern specific co-localization.



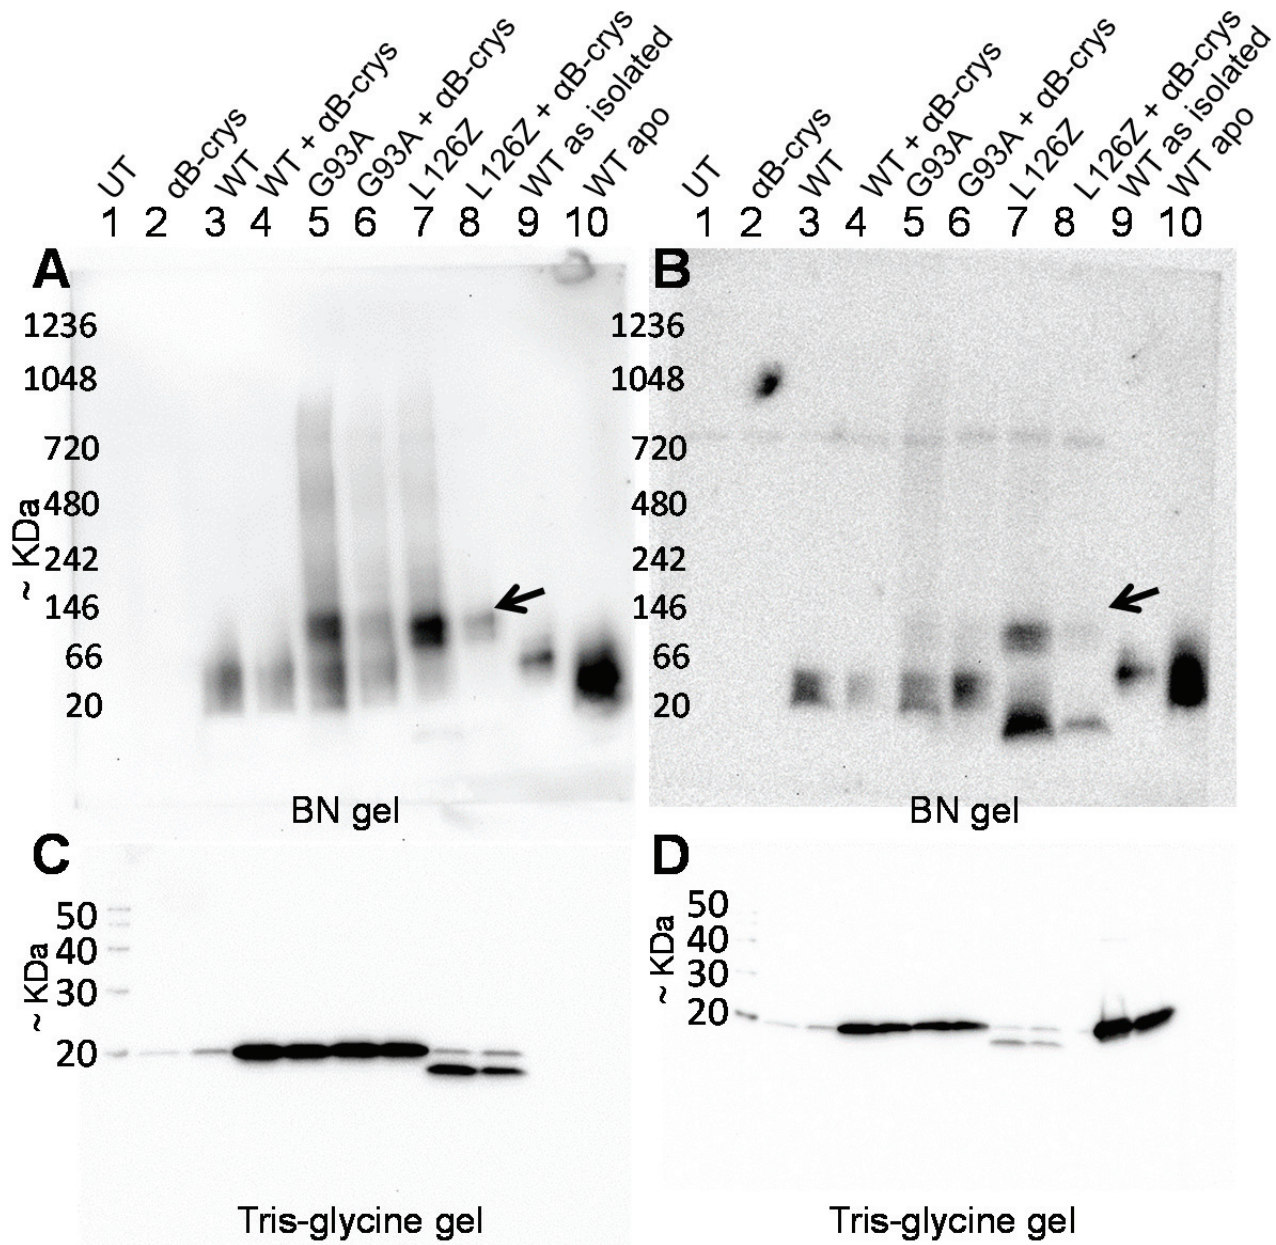

**Figure S5.** Effect of  $\alpha$ B-crys over-expression on the oligomerization of G93A and L126Z SOD1 in cultured cells. As described in Materials and Methods, HEK293FT cells were transiently transfected with expression plasmids for SOD1 and  $\alpha$ B-crys as noted above the image. The image shown is representative of at least 3 independent replications.

$\alpha$ B-crys

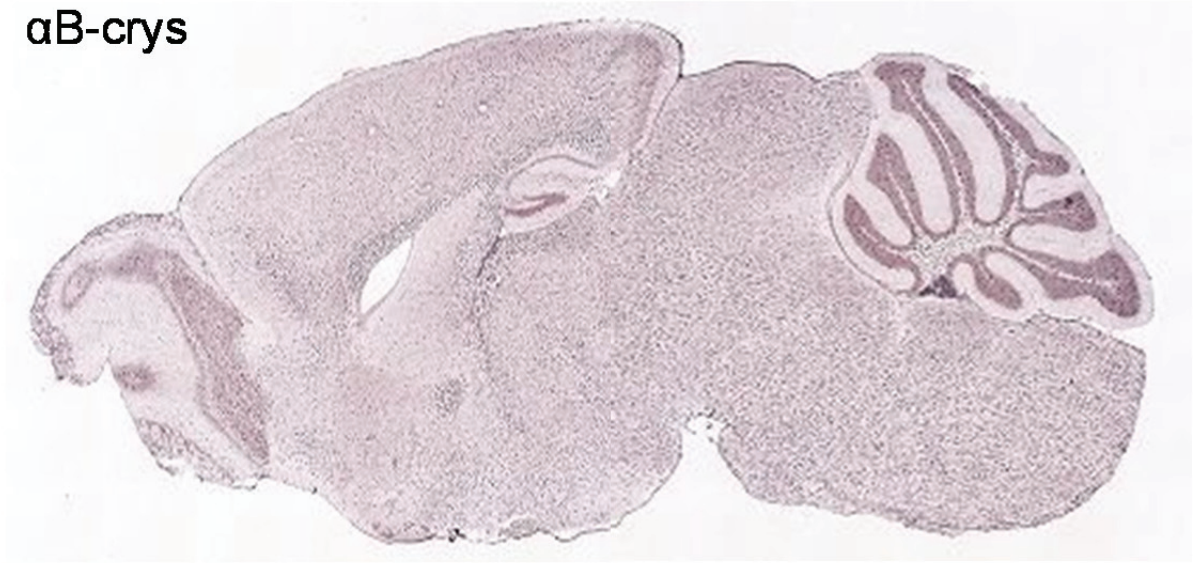

Eno-2 – neuron-specific enolase.

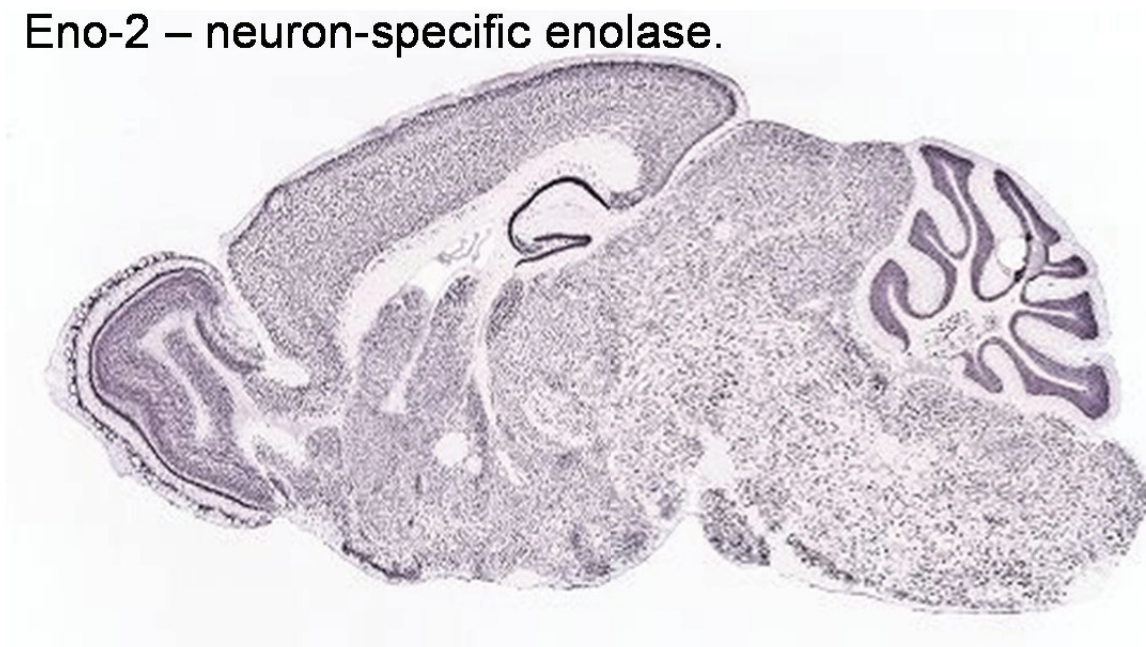

[www.brain-map.org](http://www.brain-map.org)

**Figure S6.** Captured image of in situ hybridization for  $\alpha$ B-crys mRNA in the brains of young C57BL/6J mice ([www.brain-map.org](http://www.brain-map.org)).



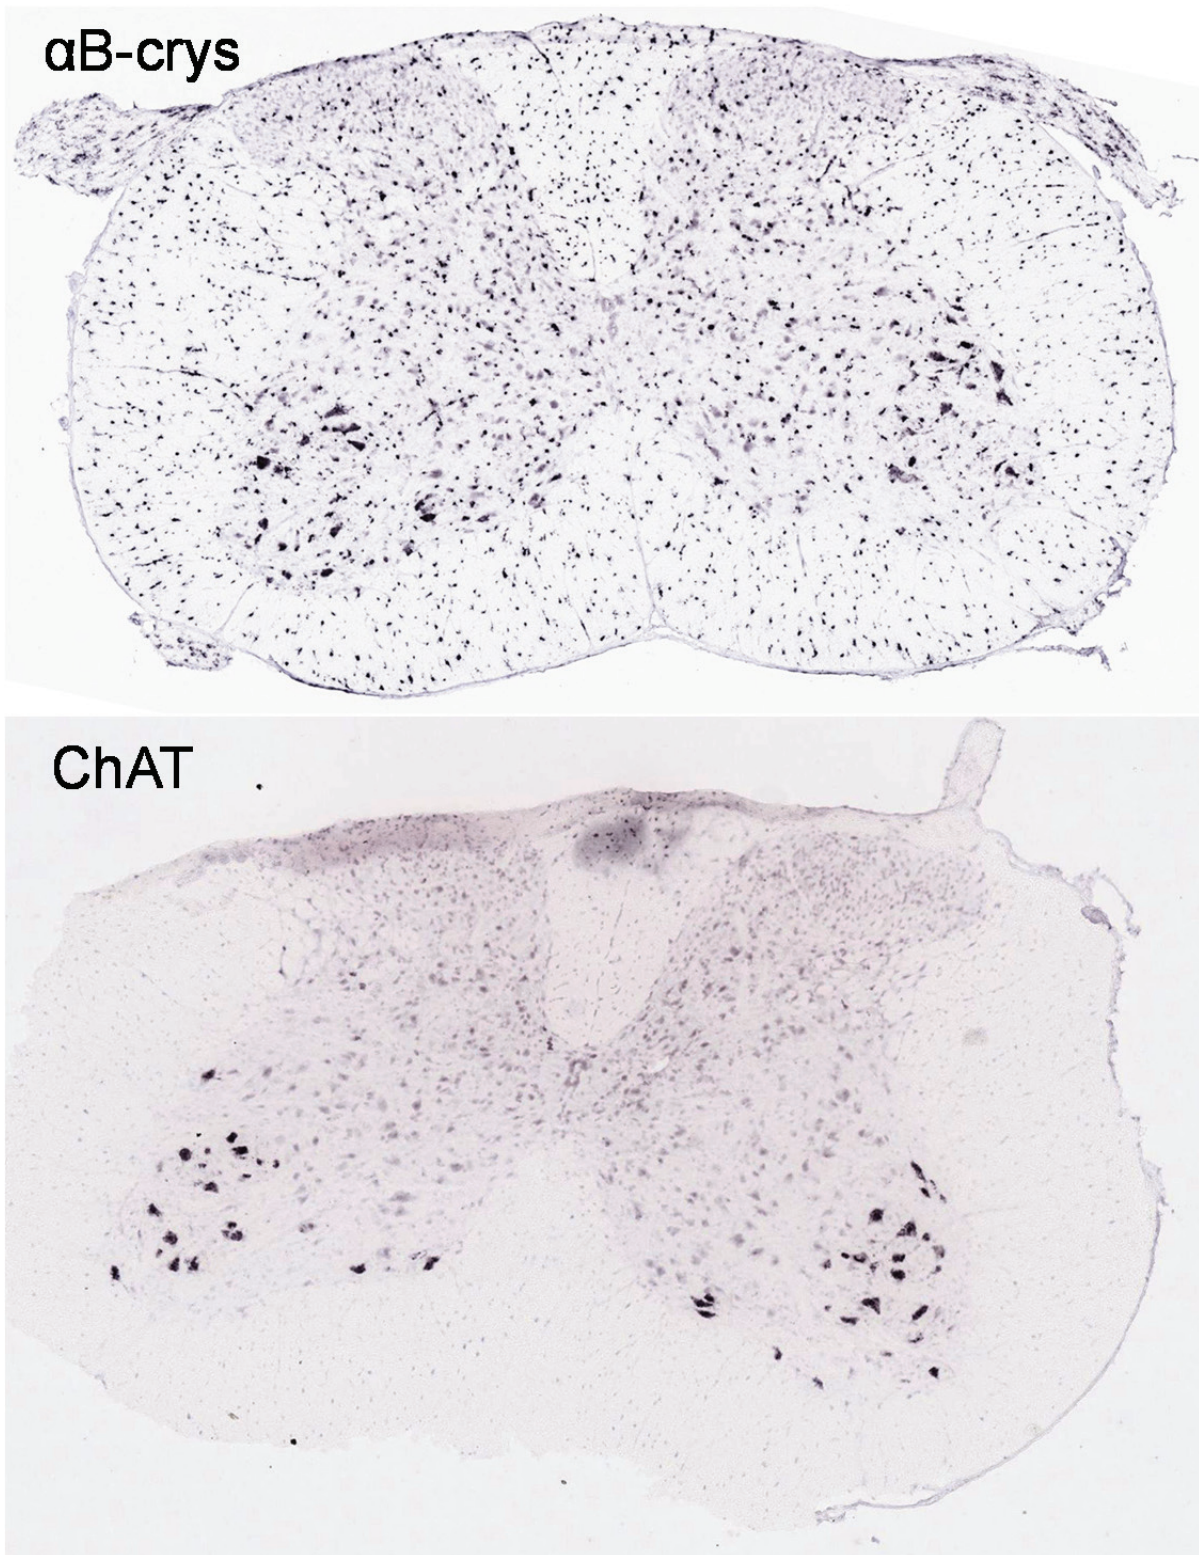

**Figure S7.** Captured image of in situ hybridization for  $\alpha$ B-crys mRNA in the spinal cords of young C57BL/6J mice ([www.brain-map.org](http://www.brain-map.org)).
